# Supplementary material
Source: MDPI journal article supplement (https://www.mdpi.com/2073-4441/10/9/1264)
Supplement: s1 [file s1]

### Symbols used in the formula No. 1

$F_1$  – Scope - number of variables, whose objectives are not met:

$$F_1 = \left( \frac{\text{Number of failed variables}}{\text{Total number of variables}} \right) \cdot 100 \quad (1)$$

$F_2$  – Frequency - number of times by which the objectives are not met:

$$F_2 = \left( \frac{\text{Number of failed tests}}{\text{Total number of tests}} \right) \cdot 100 \quad (2)$$

$F_3$  – Amplitude - amount by which the objectives are not met:

$$F_3 = \left( \frac{nse}{0.01 \cdot nse + 0.01} \right) \quad (3)$$

where:

$nse$  - normalized sum of excursions - is calculated through the formula of:

$$nse = \frac{\sum_{i=1}^n excursion_i}{\text{Total number of tests}} \quad (4)$$

where:

- when the test value must not exceed the objective:

$$Excursion_i = \left( \frac{\text{Failed test value}_i}{\text{Objective}_j} \right) - 1 \quad (5)$$

- for the cases in which the test value must not fall below the objective:

$$Excursion_i = \left( \frac{\text{Objective}_j}{\text{Failed test value}_i} \right) - 1 \quad (6)$$

### The values of CCME-WQI quality indicators for the analyzed waters and the classification of water quality.

| Fish farm            | Sampling point | F1                        | F2   | nse   | F3   | CCME-WQI | Water quality |          |
|----------------------|----------------|---------------------------|------|-------|------|----------|---------------|----------|
| Flow system          | Farm 1         | inflow into the fish farm | 50.0 | 23.21 | 0.46 | 31.51    | 63.34         | Marginal |
|                      |                | outflow from ponds        | 50.0 | 25.00 | 0.64 | 39.02    | 60.64         | Marginal |
|                      | Farm 2         | inflow into the fish farm | 37.5 | 20.83 | 0.26 | 20.63    | 72.52         | Fair     |
|                      |                | outflow from ponds        | 25.0 | 29.17 | 0.80 | 44.44    | 66.08         | Fair     |
| Cascade system       | Farm 3         | inflow into the fish farm | 37.5 | 17.50 | 0.07 | 6.54     | 75.81         | Fair     |
|                      |                | outflow from ponds        | 37.5 | 21.25 | 0.17 | 14.53    | 73.84         | Fair     |
|                      | Farm 4         | inflow into the fish farm | 37.5 | 25.00 | 0.19 | 15.97    | 72.39         | Fair     |
|                      |                | outflow from ponds        | 50.0 | 29.17 | 0.58 | 36.71    | 60.42         | Marginal |
| Recirculation system | Farm 5         | inflow into the fish farm | 50.0 | 25.00 | 1.21 | 54.75    | 54.82         | Marginal |
|                      |                | outflow from ponds        | 62.5 | 40.00 | 1.70 | 62.96    | 43.81         | Marginal |
|                      | Farm 6         | inflow into the fish farm | 50.0 | 37.50 | 0.91 | 47.64    | 54.63         | Marginal |
|                      |                | outflow from ponds        | 87.5 | 55.00 | 1.98 | 66.44    | 29.06         | Poor     |
